# Supplementary material for: Interleukin-34 promotes tumorigenic signals for colon cancer cells
Source: PubMed Central journal article supplement (PMC8448832; doi:10.1038/s41420-021-00636-4), 2021-09-17
Supplement: 41420_2021_636_MOESM1_ESM.pdf [file 41420_2021_636_MOESM1_ESM.pdf]

Please complete the table below to indicate the contributions of all named authors to the figures.

Figure 1:

E.F. : CONCEPTION , FINAL APPROVAL  
I.M. : CONCEPTION , FINAL APPROVAL  
E.T. : CONCEPTION , FINAL APPROVAL  
S.S. : CONCEPTION , FINAL APPROVAL  
G.M. : CONCEPTION AND DESIGN , FINAL APPROVAL

Figure 2:

E.F. : CONCEPTION , FINAL APPROVAL  
I.M. : CONCEPTION AND DESIGN , FINAL APPROVAL  
E.T. : CONCEPTION , FINAL APPROVAL  
S.S. : CONCEPTION , FINAL APPROVAL  
G.M. : CONCEPTION , FINAL APPROVAL

Figure 3:

E.F. : CONCEPTION AND DESIGN , FINAL APPROVAL  
I.M. : CONCEPTION , FINAL APPROVAL  
E.T. : CONCEPTION , FINAL APPROVAL  
S.S. : CONCEPTION , FINAL APPROVAL  
G.M. : CONCEPTION , FINAL APPROVAL

Figure 4:

Figure 5:

Figure 6:

Signed for and on behalf of the Author(s):

Print Name:

GIOVANNI MONTELEONE

Date:

26/05/2021
